# Supplementary material for: Gay Community Stress Scale with Its Cultural Translation and Adaptions in Taiwan
Source: MDPI journal article supplement (doi:10.3390/ijerph191811649), 2022-09-15
Supplement: s1 [file s1]

## Supplementary Table

**Table S1.** The traditional Chinese version of the Gay Community Stress Scale.

### 繁體中文版男同志族群壓力量表

以下是有些人認為**主流男同志族群**有這樣的觀點，當然不一定每個人都這麼覺得，請就你實際生活中對男同志族群的了解，回答它對你在現實生活中造成的壓力或困擾有多高。

| 正式<br>量表<br>題號 | 原始<br>量表<br>題號 |                           | 這句話描述的主流男同志社群觀點，在現實生活中對你造成 <u>壓力或困擾</u> 的程度為何？ |                       |                            |                            |                            |
|----------------|----------------|---------------------------|------------------------------------------------|-----------------------|----------------------------|----------------------------|----------------------------|
|                |                |                           | 完<br>全<br>沒<br>有<br>困<br>擾                     | 有<br>一<br>點<br>困<br>擾 | 中<br>等<br>程<br>度<br>困<br>擾 | 相<br>當<br>嚴<br>重<br>困<br>擾 | 非<br>常<br>嚴<br>重<br>困<br>擾 |
| 1              | 1              | 主流男同志族群重視性多過於深入的人際關係。     | 1                                              | 2                     | 3                          | 4                          | 5                          |
| 2              | 2              | 在主流男同志族群中，要維持感情關係是有困難的。   | 1                                              | 2                     | 3                          | 4                          | 5                          |
| 3              | 3              | 主流男同志族群過度關注性(sex)這件事。     | 1                                              | 2                     | 3                          | 4                          | 5                          |
| 4              | 4              | 在主流男同志族群之中，人人彼此都有發生過性行為。  | 1                                              | 2                     | 3                          | 4                          | 5                          |
| 5              | 5              | 主流男同志族群太過於沈迷在約炮和約會軟體。     | 1                                              | 2                     | 3                          | 4                          | 5                          |
| 6              | 6              | 主流男同志族群中很常發生危險性行為(像無套肛交)。 | 1                                              | 2                     | 3                          | 4                          | 5                          |
| 7              | 7              | 主流男同志族群過度看重一個人要有很好的工作。    | 1                                              | 2                     | 3                          | 4                          | 5                          |
| 8              | 8              | 在主流男同志族群中，富有的人比較被重視。      | 1                                              | 2                     | 3                          | 4                          | 5                          |
| 9              | 9              | 主流男同志族群極度看重有權有勢的人。        | 1                                              | 2                     | 3                          | 4                          | 5                          |
| 10             | 10             | 主流男同志族群極度看重時髦穿著以及最新時尚。    | 1                                              | 2                     | 3                          | 4                          | 5                          |
| 11             | 11             | 在主流男同志族群中有許多爭執、口角、陰險詭計。   | 1                                              | 2                     | 3                          | 4                          | 5                          |
| 12             | 12             | 主流男同志族群非常熱衷八卦、說他人是非。      | 1                                              | 2                     | 3                          | 4                          | 5                          |
| 13             | 13             | 主流男同志族群盛行著競爭和忌妒的文化。       | 1                                              | 2                     | 3                          | 4                          | 5                          |
| 14             | 14             | 主流男同志族群非常愛搞小圈圈。           | 1                                              | 2                     | 3                          | 4                          | 5                          |
| 15             | 15             | 在主流男同志族群中，朋友之間有許多猜忌、不信任。  | 1                                              | 2                     | 3                          | 4                          | 5                          |
| 16             | 16             | 主流男同志族群極度愛評斷他人。           | 1                                              | 2                     | 3                          | 4                          | 5                          |
| 17             | 17             | 主流男同志族群過度強調金錢和物質。         | 1                                              | 2                     | 3                          | 4                          | 5                          |
| 18             | 18             | 主流男同志族群常有種族或族群偏見。         | 1                                              | 2                     | 3                          | 4                          | 5                          |
| 19             | 19             | 主流男同志族群總是把有色人種跟性聯想在一起。    | 1                                              | 2                     | 3                          | 4                          | 5                          |
| 20             | 20             | 主流男同志族群會排斥感染愛滋病毒的男同志。     | 1                                              | 2                     | 3                          | 4                          | 5                          |

|    |    |                                   |   |   |   |   |   |
|----|----|-----------------------------------|---|---|---|---|---|
| 21 | 21 | 主流男同志族群過度看重健美的身材。                 | 1 | 2 | 3 | 4 | 5 |
| 22 | 22 | 主流男同志族群非常看重陰莖的尺寸。                 | 1 | 2 | 3 | 4 | 5 |
| 23 | 23 | 主流男同志族群過度看重陽剛氣質。                  | 1 | 2 | 3 | 4 | 5 |
| 24 | 24 | 主流男同志族群認為老男人比較没人要。                | 1 | 2 | 3 | 4 | 5 |
| 25 | 26 | 主流男同志族群過度瘋迷社交媒體，例如臉書、推特、IG。       | 1 | 2 | 3 | 4 | 5 |
| 26 | 28 | 主流男同志族群太愛把人歸到某個特殊類型，例如花美男、熊、運動型等。 | 1 | 2 | 3 | 4 | 5 |
| 27 | 29 | 主流男同志族群極度關注性愛姿勢，像是 1、0、不分。        | 1 | 2 | 3 | 4 | 5 |
| 28 | 30 | 主流男同志族群認為沒向家人出櫃的人是魯蛇。             | 1 | 2 | 3 | 4 | 5 |
| 29 | 32 | 主流男同志族群看輕有身體疾病的人。                 | 1 | 2 | 3 | 4 | 5 |
| 30 | 33 | 主流男同志族群看輕有精神疾病的人。                 | 1 | 2 | 3 | 4 | 5 |
| 31 | 34 | 主流男同志族群看輕原住民。                     | 1 | 2 | 3 | 4 | 5 |
| 32 | 35 | 主流男同志族群看輕住在鄉鎮、不熱鬧地區的人。            | 1 | 2 | 3 | 4 | 5 |

#### Construct, items and scoring

Mean score of the Sex construct: dividing the total scores of items 1 to 6 by 6

Mean score of the Status construct: dividing the total scores of items 7, 8, 9, 10 and 17 by 5

Mean score of the Competition construct: dividing the total scores of items 11 to 16 by 6

Mean score of the Exclusion construct: dividing the total scores of items 18, 19, 20, 28, 29, 30, 31 and 32 by 8

Mean score of the Externals construct: dividing the total scores of items 21, 22, 23, 24, 25, 26 and 27 by 7
